# Supplementary material
Source: Springer Nature journal article supplement (http://www.springermedizin.de/resource/supplementary/12967_2013_1608_MOESM5_ESM.pdf/9574460)

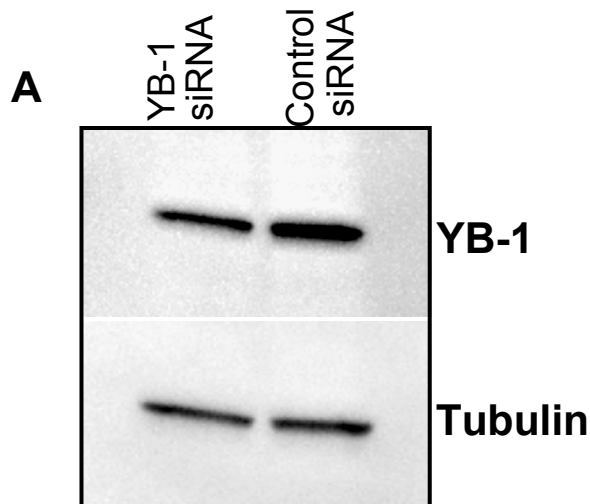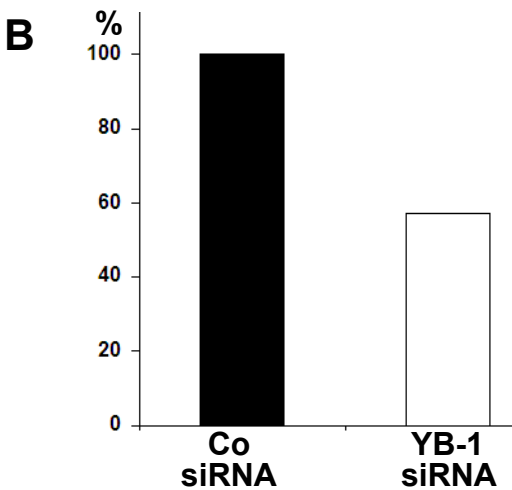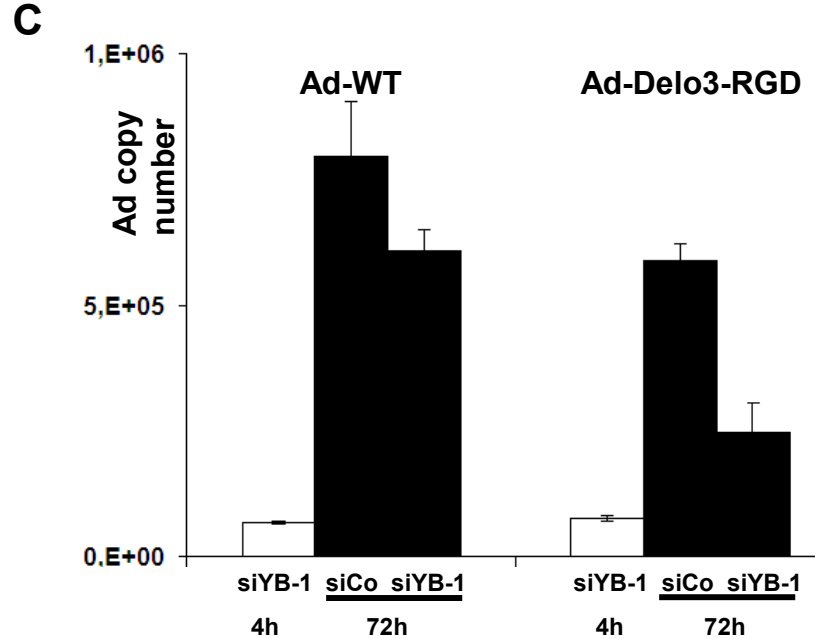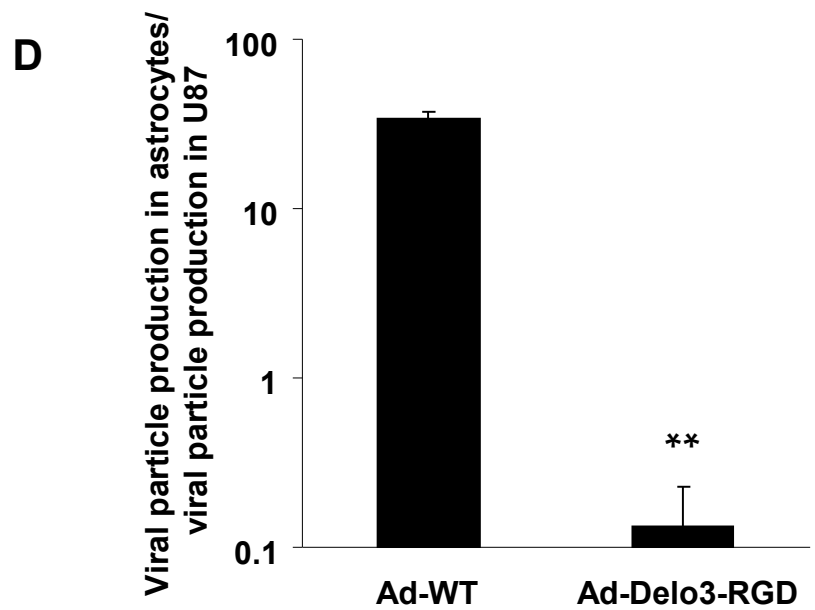

Supplement: MOESM5 [file 9574460]
